# Supplementary material
Source: PubMed Central journal article supplement (PMC7909741)
Supplement: NIHMS1672211-supplement-Supplementary_Material.pdf [file NIHMS1672211-supplement-Supplementary_Material.pdf]

## Supporting Information

### Vibrational Probes of Molybdenum Cofactor–Protein Interactions in Xanthine Dehydrogenase.

Chao Dong<sup>1</sup>, Jing Yang<sup>1</sup>, Stefan Reschke<sup>2</sup>, Silke Leimkühler<sup>2\*</sup>, and Martin L. Kirk<sup>1\*</sup>

<sup>1</sup>*Department of Chemistry and Chemical Biology, The University of New Mexico, MSC03 2060, 1 University of New Mexico, Albuquerque, NM 87131-0001, United States.*

<sup>2</sup>*Institute of Biochemistry and Biology, Department of Molecular Enzymology, University of Potsdam, 14476 Potsdam, Germany.*

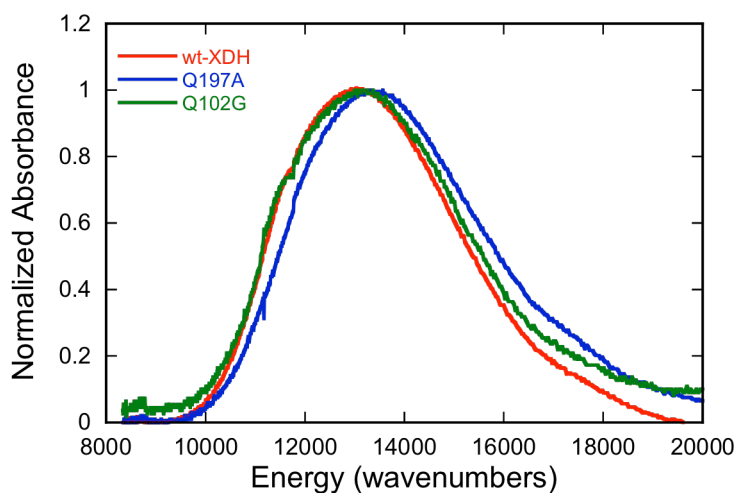

Figure S1. Normalized electronic absorption spectra detailing the NIR MLCT band for  $w_{\text{red-2,4-TV}}$  (red),  $Q197A_{\text{red-2,4-TV}}$  (blue), and  $Q102G_{\text{red-2,4-thioviolatperin}}$  ( $Q102G_{\text{red-4-TV}}$ ) (green).

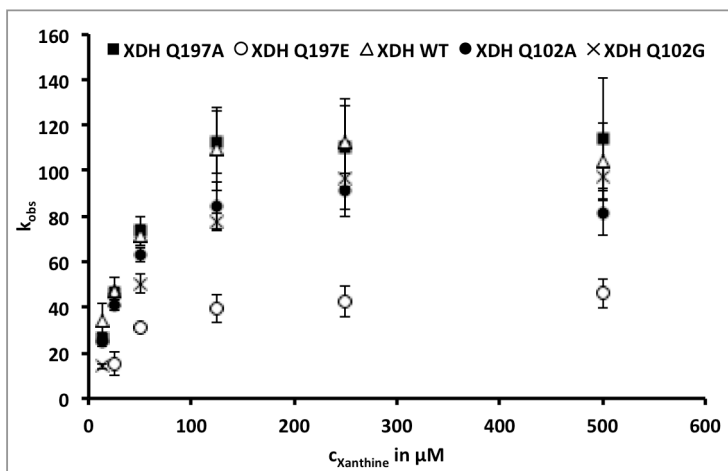

Figure S2. Kinetic data for obtaining  $k_{\text{red}}$ , and  $K_{\text{D}}$ .

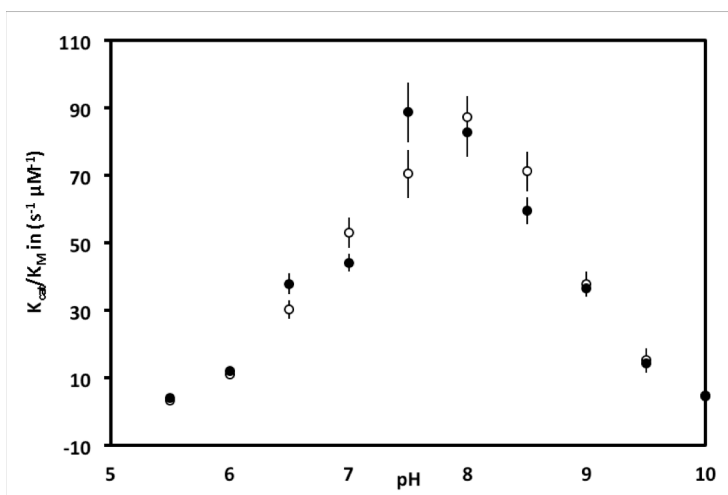

Figure S3. **pH dependent comparison of  $k_{\text{cat}}/K_{\text{M}}$  for wild type XDH (open circles) and XDH Q197A (closed circles).** Assays were conducted at 25°C in 1 ml cuvettes in 100 mM CAPS, 100 mM KCl (pH 9-10); 50 mM Tris, 100 mM NaCl (pH 7-9) and 100 mM MES, 100 mM KCl (pH 5.5-6.5) using 500  $\mu\text{M}$   $\text{NAD}^+$  and varying concentrations of xanthine (25, 50, 75, 100, 200, 500  $\mu\text{M}$ ). The reaction was followed 1 min at 340 nm with a Shimadzu UV-2401PC UV-VIS recording spectrophotometer.

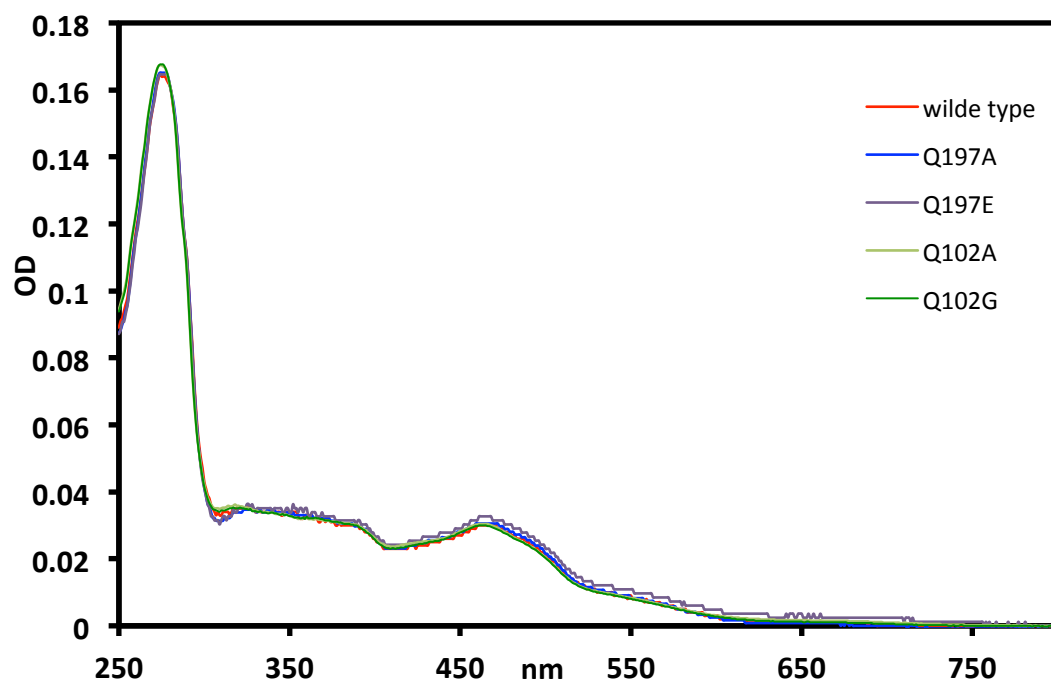

Figure S4: **UV-Vis spectra of wild type XDH and variants.** Spectra of wild type (red), Q197A (blue), Q197E (purple), Q102A (light green) and Q102G (green) were recorded in the range of 250-800 nm and normalized to wild type at 280 nm.

Figure S5. CD-Spectroscopy:

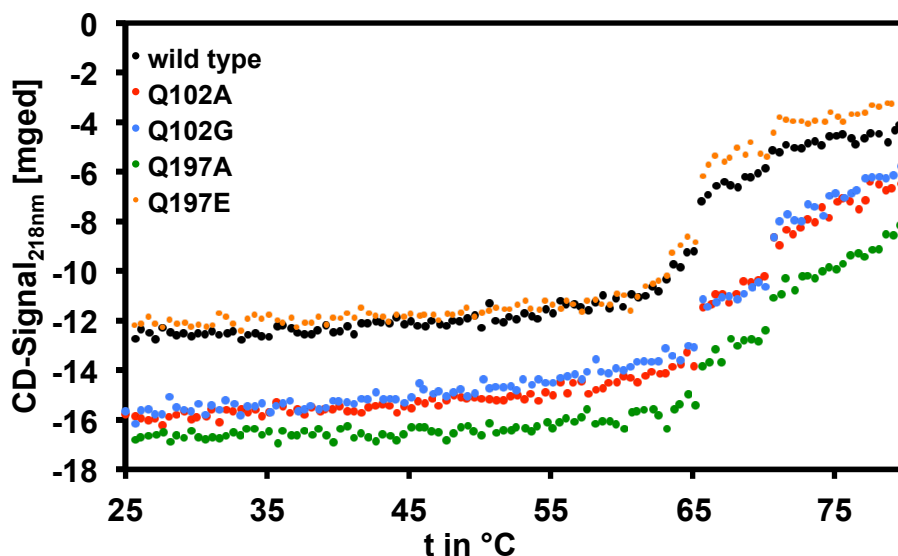

**S5. CD-Spectroscopy:** Thermal denaturation curves of XDH wild type (black), Q102A (red), Q102G (blue), Q197A (green) and Q197E (orange) were recorded at 218 nm at temperatures ranging from 25°C to 80°C. Signals were recorded using a 0.1 cm cuvette at 1°C/min and a data integration time of 8 sec using a Jasco (J-815) CD-Spectropolarimeter. Protein concentration was adjusted to 1  $\mu\text{M}$  ( $\epsilon_{465} = 31600 \text{ M}^{-1}\text{cm}^{-1}$ ).

Table S1. Metal content analysis for *wt*, Q102 variants, and Q197 variants.

| Protein   | Mo               | Fe                |
|-----------|------------------|-------------------|
|           | Saturation in %  | Saturation in %   |
| <i>wt</i> | 68.28 $\pm$ 7.15 | 93.04 $\pm$ 1.84  |
| Q197A     | 72.14 $\pm$ 6.72 | 99.62 $\pm$ 2.70  |
| Q197E     | 49.82 $\pm$ 7.21 | 90.53 $\pm$ 4.03  |
| Q102A     | 67.76 $\pm$ 2.93 | 105.84 $\pm$ 1.98 |
| Q102G     | 69.77 $\pm$ 2.33 | 95.95 $\pm$ 1.71  |

Table S1. **Metal content analysis.** Metal content was analyzed using an Optima 2100DV inductively coupled plasma-optical emission spectrometer. Protein samples were incubated overnight in a 1:1 mixture with 65% nitric acid at 100 °C. This mixture was diluted with a 4-fold volume of ultrapure water prior to ICP-OES analysis. The multielement standard solution XVI (Merck) was used as a reference (1). The percent saturation is related to a 100% saturation with molybdenum and two [2Fe2S] clusters (4 iron atoms in total).

### Cartesian (x,y,z) Coordinates for Mo(IV)-4-TV

|    |              |             |             |
|----|--------------|-------------|-------------|
| N  | 7.13039500   | 0.30806500  | 1.28096500  |
| C  | 8.33056900   | -0.36085400 | 1.12224000  |
| N  | 8.29954600   | -1.35416300 | 0.14931000  |
| C  | 7.20731500   | -1.74717700 | -0.67033600 |
| C  | 6.00203600   | -1.00705100 | -0.44579400 |
| C  | 3.76433100   | -0.53177100 | -0.89814100 |
| N  | 4.83602100   | -1.26305500 | -1.15952500 |
| C  | 3.73999900   | 0.53945000  | 0.10159500  |
| C  | 5.96466700   | 0.03736500  | 0.54116300  |
| N  | 4.90084900   | 0.79013400  | 0.82290100  |
| C  | -2.63742900  | -1.58476900 | 2.80598400  |
| C  | -2.27979700  | -1.76604000 | 1.33798000  |
| O  | -3.58598000  | -2.16620200 | 0.71764100  |
| C  | -1.61201000  | -0.59367300 | 0.64512500  |
| S  | 0.13659700   | -0.29618300 | 1.11087800  |
| C  | -2.21626100  | 0.14041900  | -0.31843900 |
| S  | -1.36804100  | 1.50683500  | -1.19283100 |
| N  | -7.48782000  | -1.88259100 | -0.72499000 |
| C  | -8.51687100  | -1.13151700 | -0.38729000 |
| N  | -9.82078900  | -1.63549500 | -0.48055700 |
| N  | -8.36211900  | 0.17315800  | 0.03398300  |
| C  | -7.09396400  | 0.82597300  | 0.14557400  |
| O  | -7.05123600  | 2.02624700  | 0.56065700  |
| N  | -4.68528200  | 0.49833600  | -0.20310400 |
| C  | -3.58424900  | -0.23243900 | -0.85249400 |
| C  | -3.80384700  | -1.75823600 | -0.67236900 |
| N  | -5.15710400  | -2.12862300 | -1.02954400 |
| C  | -5.97825000  | 0.00288200  | -0.24665100 |
| C  | -6.22358200  | -1.31537100 | -0.66046000 |
| O  | 2.68057600   | 1.23480600  | 0.33508000  |
| O  | 0.47695000   | 3.13400300  | 1.09375100  |
| Mo | 0.75364100   | 1.82852400  | 0.01195400  |
| S  | 1.62639400   | 2.64526000  | -2.16881100 |
| C  | -2.28452000  | -0.56169700 | 3.60685400  |
| H  | -1.66212600  | 0.25297300  | 3.24804100  |
| H  | -2.60312300  | -0.53429500 | 4.64868800  |
| H  | -3.25446500  | -2.39997200 | 3.19219700  |
| H  | -4.50714400  | 1.40633400  | 0.20641500  |
| H  | -5.37196500  | -3.10992200 | -1.15924500 |
| H  | -9.16009200  | 0.76778700  | 0.23431800  |
| H  | -9.87794400  | -2.59384800 | -0.79797800 |
| H  | -10.53307800 | -1.31183400 | 0.16018600  |
| H  | 7.07686400   | 1.04799100  | 1.97292400  |
| H  | 9.16435800   | -1.86505300 | 0.00575800  |
| H  | 2.98245100   | 2.66951800  | -1.88593800 |
| H  | 2.85442800   | -0.73180100 | -1.45631600 |
| H  | -3.09830700  | -2.29073300 | -1.32695000 |
| H  | -3.59038400  | -0.03387100 | -1.93793700 |
| H  | -1.61325700  | -2.64260500 | 1.24941800  |
| S  | 7.49276500   | -3.02781200 | -1.78902200 |
| O  | 9.36628100   | -0.09780700 | 1.79632200  |

### Cartesian (x,y,z) Coordinates for Mo(IV)-2,4-TV

|    |              |             |             |
|----|--------------|-------------|-------------|
| N  | 6.90452200   | 0.27719500  | 1.08462800  |
| C  | 8.07935500   | -0.40228000 | 0.90115400  |
| N  | 8.02719400   | -1.38359600 | -0.05917700 |
| C  | 6.91564000   | -1.76986400 | -0.86493800 |
| C  | 5.72275400   | -1.01907400 | -0.61838400 |
| C  | 3.48293200   | -0.51819800 | -1.02290500 |
| N  | 4.54028800   | -1.26238100 | -1.30866200 |
| C  | 3.49100300   | 0.55269800  | -0.02287800 |
| C  | 5.71634400   | 0.02471700  | 0.36905900  |
| N  | 4.67044300   | 0.79052200  | 0.67481300  |
| C  | -2.81588000  | -1.55864200 | 2.81929500  |
| C  | -2.47977400  | -1.74748000 | 1.34722300  |
| O  | -3.79188600  | -2.16105000 | 0.74922500  |
| C  | -1.83106400  | -0.57508300 | 0.63664400  |
| S  | -0.07628500  | -0.26590200 | 1.06836500  |
| C  | -2.45560300  | 0.15006200  | -0.32033900 |
| S  | -1.62849700  | 1.51266700  | -1.21988900 |
| N  | -7.72115700  | -1.90479500 | -0.62409000 |
| C  | -8.74825500  | -1.15884100 | -0.26929300 |
| N  | -10.05055800 | -1.66992600 | -0.33918000 |
| N  | -8.59332400  | 0.14727100  | 0.14766800  |
| C  | -7.32710700  | 0.80720900  | 0.23568600  |
| O  | -7.28304000  | 2.00801400  | 0.64881400  |
| N  | -4.92362100  | 0.49359000  | -0.15808600 |
| C  | -3.83128800  | -0.23202600 | -0.82697600 |
| C  | -4.03779900  | -1.75889100 | -0.63821600 |
| N  | -5.39479800  | -2.13822100 | -0.96954800 |
| C  | -6.21424300  | -0.01012100 | -0.17602700 |
| C  | -6.45927100  | -1.33037700 | -0.58282900 |
| O  | 2.44424500   | 1.25927700  | 0.23240000  |
| O  | 0.25822400   | 3.16421400  | 1.01636100  |
| Mo | 0.51489400   | 1.84991800  | -0.05913800 |
| S  | 1.34401600   | 2.64628400  | -2.26262100 |
| C  | -2.46212900  | -0.52511000 | 3.60619800  |
| H  | -1.85491700  | 0.29377000  | 3.23132900  |
| H  | -2.76418800  | -0.49282300 | 4.65273000  |
| H  | -3.41727800  | -2.37754800 | 3.22178000  |
| H  | -4.74292300  | 1.40148000  | 0.25044500  |
| H  | -5.60617100  | -3.12095200 | -1.09400500 |
| H  | -9.39100900  | 0.73758600  | 0.36149300  |
| H  | -10.10865200 | -2.62860100 | -0.65540800 |
| H  | -10.75411400 | -1.34865600 | 0.31228000  |
| H  | 6.87150700   | 1.01701500  | 1.77864000  |
| H  | 8.88186400   | -1.90666100 | -0.22157900 |
| H  | 2.70582500   | 2.65701000  | -2.00886400 |
| H  | 2.55921100   | -0.70780100 | -1.56171600 |
| H  | -3.34097400  | -2.28926100 | -1.30372200 |
| H  | -3.85967200  | -0.03691700 | -1.91264100 |
| H  | -1.80817800  | -2.61962100 | 1.25422500  |
| S  | 7.17764300   | -3.05161700 | -1.98524100 |
| S  | 9.51419700   | -0.05756100 | 1.80132300  |
